# Supplementary material for: Effect of exonic splicing regulation on synonymous codon usage in alternatively spliced exons of Dscam
Source: PubMed Central journal article supplement (PMC2741454; doi:10.1186/1471-2148-9-214), 2009-08-27

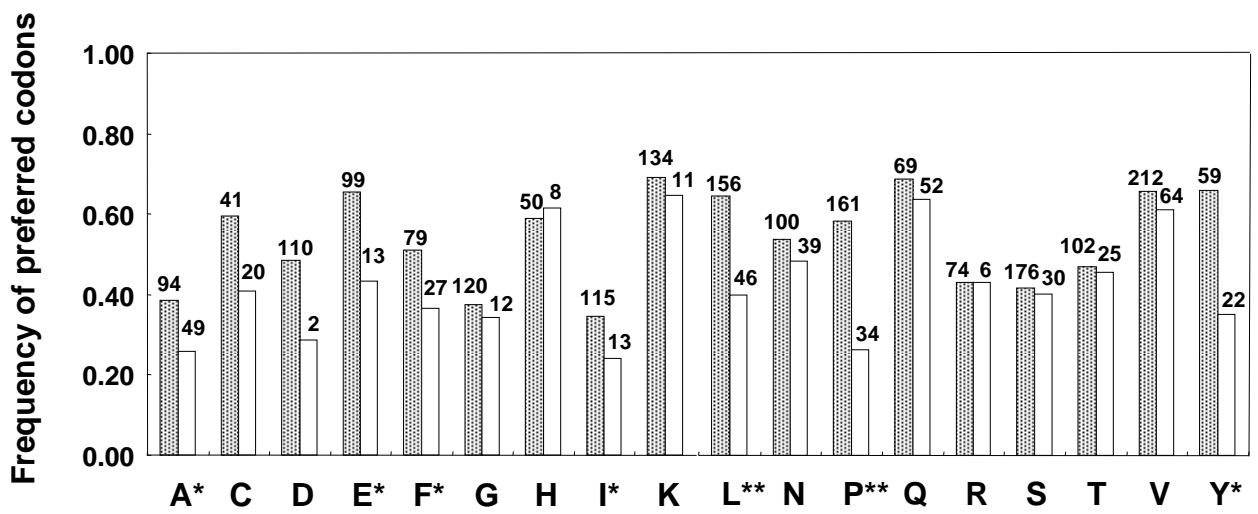

Supplement: 1471-2148-9-214-S1.pdf [file 1471-2148-9-214-S1.pdf]
