# Supplementary material for: Effect of exonic splicing regulation on synonymous codon usage in alternatively spliced exons of Dscam
Source: PubMed Central journal article supplement (PMC2741454; doi:10.1186/1471-2148-9-214), 2009-08-27
Supplement: 1471-2148-9-214-S5.pdf [file 1471-2148-9-214-S5.pdf]

## Additional file 5

---

|                                                                  |               |             |               |             |               |                           |               |                           |
|------------------------------------------------------------------|---------------|-------------|---------------|-------------|---------------|---------------------------|---------------|---------------------------|
| Conserved amino acid residue                                     | C at position |             | Q at position |             | P at position |                           | P at position |                           |
|                                                                  | 34            |             | 37            |             | 40            |                           | 42            |                           |
| Codon usage preference for translational efficiency <sup>a</sup> | Pref. UGC     | Unpref. UGU | Pref. CAG     | Unpref. CAA | Pref. CCC     | Unpref. CCU<br>CCG<br>CCA | Pref. CCC     | Unpref. CCU<br>CCG<br>CCA |

---

Number of codons used

|                                        |          |    |         |    |        |    |          |    |
|----------------------------------------|----------|----|---------|----|--------|----|----------|----|
| Dscam exon 6.1 – 6.16<br>(N = 16)      | 4        | 12 | 11      | 5  | 3      | 13 | 5        | 11 |
| Dscam exon 6.17 – 6.32<br>(N = 16)     | 4        | 12 | 6       | 10 | 4      | 12 | 3        | 13 |
| Dscam exon 6.33 – 6.48<br>(N = 16)     | 12       | 4  | 11      | 5  | 2      | 14 | 11       | 5  |
| Total                                  | 20 < 28  |    | 28 > 20 |    | 9 < 39 |    | 19 < 29  |    |
| Fisher's exact test (3x2) <sup>b</sup> | P < 0.05 |    | n.s.    |    | n.s.   |    | P < 0.05 |    |

---

<sup>a</sup> Preferred codons based on Sharp and Lloyd [58]

<sup>b</sup> Bonferroni correction applied.
