# Supplementary material for: Effect of exonic splicing regulation on synonymous codon usage in alternatively spliced exons of Dscam
Source: PubMed Central journal article supplement (PMC2741454; doi:10.1186/1471-2148-9-214), 2009-08-27
Supplement: 1471-2148-9-214-S6.pdf [file 1471-2148-9-214-S6.pdf]

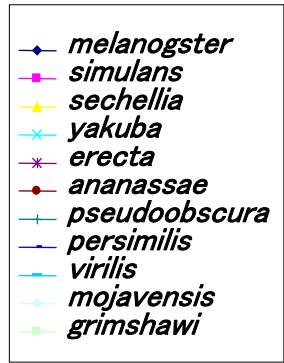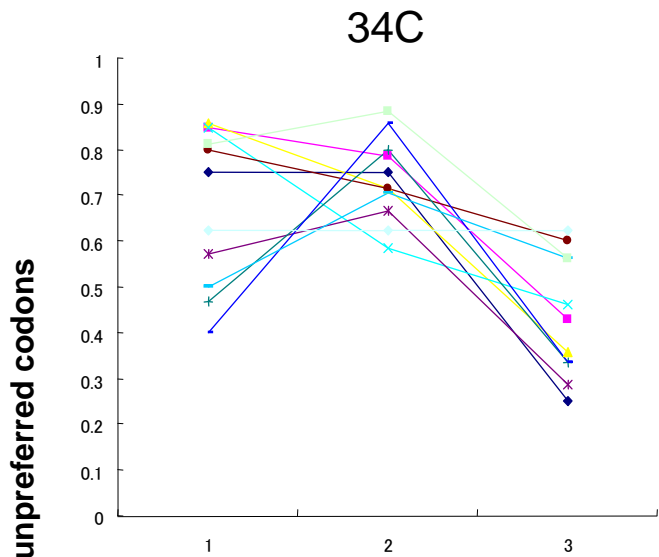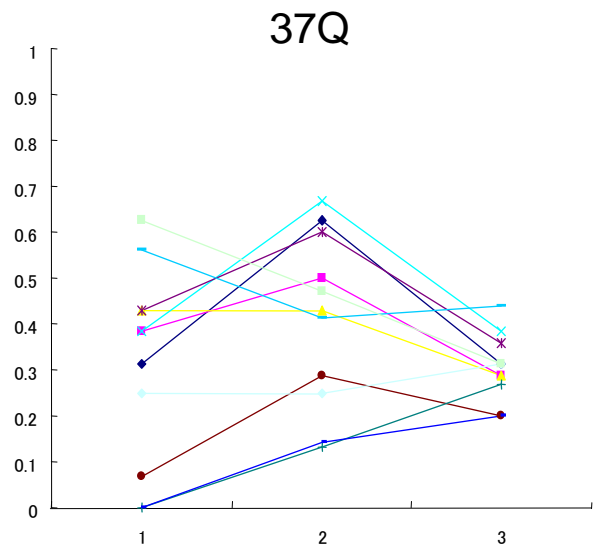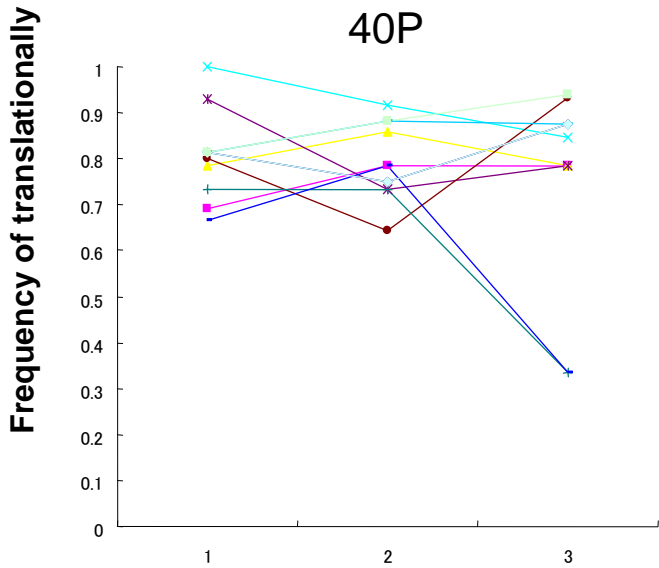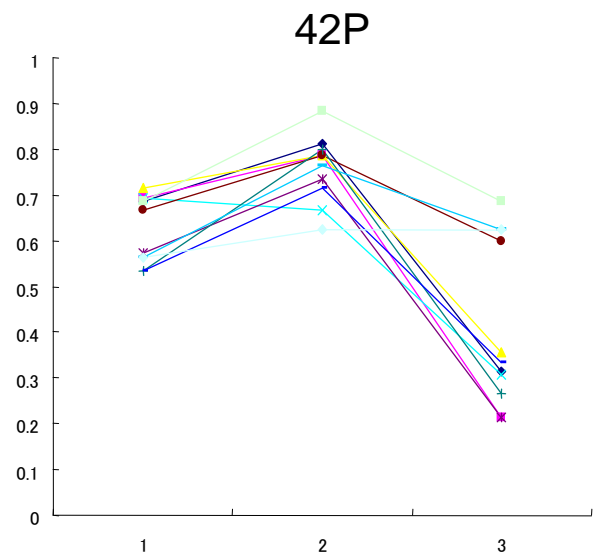

←  
exon 5

→  
exon 7

←  
exon 5

→  
exon 7
