# Supplementary material for: Effect of exonic splicing regulation on synonymous codon usage in alternatively spliced exons of Dscam
Source: PubMed Central journal article supplement (PMC2741454; doi:10.1186/1471-2148-9-214), 2009-08-27
Supplement: 1471-2148-9-214-S7.pdf [file 1471-2148-9-214-S7.pdf]

**Additional file 7**

|                         | <i>N</i> | CBI <sub>center</sub><br>vs.<br>CBI <sub>3</sub> -boundary |          |                              | CBI <sub>center</sub><br>vs.<br>CBI <sub>5</sub> -boundary |          |                              | CBI <sub>5</sub> -boundary<br>vs.<br>CBI <sub>3</sub> -boundary |          |                              |
|-------------------------|----------|------------------------------------------------------------|----------|------------------------------|------------------------------------------------------------|----------|------------------------------|-----------------------------------------------------------------|----------|------------------------------|
|                         |          | <i>T</i> <sup>a</sup>                                      | <i>z</i> | <i>P</i> -value <sup>d</sup> | <i>T</i> <sup>b</sup>                                      | <i>z</i> | <i>P</i> -value <sup>d</sup> | <i>T</i> <sup>c</sup>                                           | <i>z</i> | <i>P</i> -value <sup>d</sup> |
| <i>D. simulans</i>      | 41       | 87                                                         | -4.451   | ****                         | 257                                                        | -2.248   | n.s. <sup>e</sup>            | 111                                                             | -4.140   | ***                          |
| <i>D. sechellia</i>     | 42       | 104                                                        | -4.345   | ****                         | 283                                                        | -2.107   | n.s. <sup>e</sup>            | 106                                                             | -4.320   | ****                         |
| <i>D. yakuba</i>        | 38       | 122                                                        | -3.604   | **                           | 290                                                        | -1.167   | n.s.                         | 134                                                             | -3.430   | **                           |
| <i>D. erecta</i>        | 43       | 155                                                        | -3.840   | **                           | 335                                                        | -1.666   | n.s.                         | 180                                                             | -3.538   | **                           |
| <i>D. ananassae</i>     | 44       | 273                                                        | -2.591   | n.s. <sup>e</sup>            | 595                                                        | 1.167    | n.s.                         | 133                                                             | -4.225   | ***                          |
| <i>D. pseudoobscura</i> | 45       | 419                                                        | -1.112   | n.s.                         | 611                                                        | 1.055    | n.s.                         | 320                                                             | -2.229   | n.s. <sup>e</sup>            |
| <i>D. persimilis</i>    | 44       | 427                                                        | -0.794   | n.s.                         | 609                                                        | 1.330    | n.s.                         | 308                                                             | -2.182   | n.s. <sup>e</sup>            |
| <i>D. virilis</i>       | 49       | 384                                                        | -2.273   | n.s. <sup>e</sup>            | 620                                                        | 0.075    | n.s.                         | 339                                                             | -2.721   | *                            |
| <i>D. mojavensis</i>    | 48       | 289                                                        | -3.067   | *                            | 751                                                        | 1.672    | n.s. <sup>e</sup>            | 175                                                             | -4.236   | ***                          |
| <i>D. grimshawi</i>     | 52       | 360                                                        | -2.996   | *                            | 845                                                        | 1.421    | n.s.                         | 194                                                             | -4.508   | ****                         |

<sup>a</sup> Absolute value of the sum of negative ranks of the difference in CBI (CBI<sub>center</sub> – CBI<sub>3</sub>-boundary).

<sup>b</sup> Absolute value of the sum of negative ranks of the difference in CBI (CBI<sub>center</sub> – CBI<sub>5</sub>-boundary).

<sup>c</sup> Absolute value of the sum of negative ranks of the difference in CBI ( $CBI_{5 \text{ - boundary}} - CBI_{3 \text{ - boundary}}$ ).

<sup>d</sup> \*  $P < 0.05$ , \*\*  $P < 0.01$ , \*\*\*  $P < 0.001$ , \*\*\*\*  $P < 0.0001$ , by Wilcoxon's rank sum test after Bonferroni correction for multiple (10) tests.

<sup>e</sup>  $P < 0.05$  by Wilcoxon's rank sum test before correction.
