# Supplementary material for: Effect of exonic splicing regulation on synonymous codon usage in alternatively spliced exons of Dscam
Source: PubMed Central journal article supplement (PMC2741454; doi:10.1186/1471-2148-9-214), 2009-08-27
Supplement: 1471-2148-9-214-S9.pdf [file 1471-2148-9-214-S9.pdf]

Additional file 9

| #  | Parental genes      |                                                         |                        |                            |                            | Processed genes     |                        |                            |                            |                       |
|----|---------------------|---------------------------------------------------------|------------------------|----------------------------|----------------------------|---------------------|------------------------|----------------------------|----------------------------|-----------------------|
|    | Locus               | internal exons<br>(length in numbers of<br>full codons) | CBI <sub>central</sub> | CBI <sub>5' boundary</sub> | CBI <sub>3' boundary</sub> | Locus               | CBI <sub>central</sub> | CBI <sub>5' boundary</sub> | CBI <sub>3' boundary</sub> | $K_S^a$<br>whole gene |
| 1  | <i>CG8331</i>       | exon 2 (77)                                             | 0.367                  | 0.579                      | 0.300                      | <i>CG4960</i>       | 0.333                  | 0.215                      | 0.257                      | 0.32681               |
| 2  | <i>CG17734</i>      | exon 2 (62)                                             | 0.466                  | 0.294                      | 0.644                      | <i>CG11825</i>      | 0.174                  | 0.092                      | 0.429                      | 0.73976               |
| 3  | <i>Atg8a</i>        | exon 2 (66)                                             | 0.683                  | 0.464                      | 0.379                      | <i>CG12334</i>      | 0.636                  | 0.455                      | 0.270                      | 0.73999               |
| 4  | <i>CG8310</i>       | exon 3 (121)                                            | 0.604                  | 0.644                      | 0.654                      | <i>Vha36</i>        | 0.604                  | 0.287                      | 0.774                      | 0.80580               |
| 5  | <i>Trxr1</i>        | exon 2 (114)                                            | 0.642                  | 0.405                      | 0.881                      | <i>Trxr2</i>        | 0.543                  | 0.193                      | 1.000                      | 0.89926               |
| 6  | <i>Ef1alpha100E</i> | exon 2 (68)                                             | 0.635                  | 0.381                      | 0.179                      | <i>Ef1alpha 48D</i> | 0.774                  | 0.564                      | 0.797                      | 0.91664               |
| 7  | <i>Pros28.1</i>     | exon 2 (76)                                             | 0.392                  | 0.556                      | 0.351                      | <i>Pros28.1A</i>    | 0.160                  | 0.444                      | 0.444                      | 0.95103               |
| 8  | <i>CanB2</i>        | exon 3 (99)                                             | 0.619                  | 0.474                      | 0.280                      | <i>CanB</i>         | 0.315                  | 0.579                      | 0.160                      | 1.03241               |
| 9  | <i>CanA1</i>        | exon 2 (110)                                            | 0.520                  | 0.351                      | 0.250                      | <i>CG9819</i>       | 0.411                  | 0.061                      | 0.679                      | 1.16483               |
| 10 |                     | exon 4 (48)                                             | 0.482                  | 0.192                      | 0.405                      |                     | 0.528                  | 0.755                      | 0.395                      |                       |
| 11 |                     | exon 5 (72)                                             | 0.564                  | 0.327                      | 0.270                      |                     | 0.762                  | 0.657                      | 0.590                      |                       |
| 12 | <i>CG9091</i>       | exon 2 (45)                                             | 0.897                  | 0.270                      | 0.803                      | <i>CG9873</i>       | 0.368                  | 0.368                      | 0.395                      | 1.22348               |
| 13 | <i>Acon</i>         | exon 3 (168)                                            | 0.602                  | 0.357                      | 0.200                      | <i>CG4706</i>       | 0.257                  | 0.077                      | 0.345                      | 1.52027               |

<sup>a</sup>  $K_S$  values from the whole gene comparison were taken from Betran *et al.* [54].
